# Supplementary material
Source: PubMed Central journal article supplement (PMC1740574)
Supplement: oenvmed_60_7_531__1.pdf [file oenvmed_60_7_531__1.pdf]

## Web-only References

- w1 Ramazzini B. *De Morbis Artificum Diatriba (Diseases of Workers)*. New York, NY USA: New York Academy of Medicine, 1713.
- w2 Tamashiro H, Agaki H, Arakaki M, *et al.* Causes of death in Minimata disease: Analysis of death certificates. *Int Arch Occup Environ Health* 1984;**54**:135-146.
- w3 Rosenman KD. Chemical contamination episodes. In: Rom WN, ed. *Environmental and Occupational Medicine*. Boston: Little, Brown and Co., 1983:595-602.
- w4 Hamilton A, Hardy H. *Industrial Toxicology*. Acton, MA USA: Publishing Sciences Group, 1974.
- w5 Hunter D. *The Diseases of Occupations*. 6<sup>th</sup> ed. London: Hodder & Stoughton, 1978.
- w6 Anger WK, Johnson BL. Human behavioral neurotoxicology: Workplace and community assessments. In: Rom W, ed. *Environmental and Occupational Medicine*. 2<sup>nd</sup> ed. Little, Brown and Co., 1992: 573-592.
- w7 Beard RR. Early development of behavioral toxicology in the U.S. In: Xintaras C, Johnson BL, deGroot I, eds. *Behavioral Toxicology*. Washington, DC: DHHS (NIOSH) Publication 74-126, 1974:427-431.
- w8 Johnson BL, Anger WK. Behavioral toxicology. In: Rom W, ed. *Environmental and Occupational Medicine*. Boston: Little, Brown & Co., 1983:329-350.
- w9 Cohen A. NIOSH behavioral research programs. In: Xintaras C, Johnson BL, deGroot I, eds. *Behavioral Toxicology*. Washington, DC: DHHS (NIOSH) Publication 74-126;1974:21-25.
- w10 Reiter LW. Introductory remarks to workshop on neurotoxicity testing in human populations. *Neurobehav Toxicol Teratol* 1985;**7**:287-288.
- w11 Matarazzo JD. *Wechsler's Measurement and Appraisal of Adult Intelligence*. 5<sup>th</sup> ed. New York: Oxford University Press, 1972.
- w12 Lezak MD. *Neuropsychological Assessment*. 3<sup>rd</sup> ed. New York: Oxford University Press, 1995.
- w13 Anger WK, Storzbach D, Amler RW, *et al.* Human behavioral neurotoxicology: Workplace and community assessments. In: Rom W, ed. *Environmental and Occupational Medicine*. 3<sup>rd</sup> ed. Philadelphia:Lippencott-Raven, 1998:709-731.  
•Describes how to develop a field study to detect neurotoxic effects.

- w14 Anger WK. Neurobehavioral testing of chemicals: Impact on recommended standards. *Neurobehav Toxicol Teratol* 1984;**6**:147-153.
- w15 De Rosa CT, Hicks HE, Cibulas W Jr., *et al.* Neurodevelopmental effects: Making the case for biologic plausibility. *Neurotoxicol* 2000;**21**:979-988.
- w16 National Research Council. *Environmental Neurotoxicology*. Washington, DC: National Academy Press, 1992.
- w17 National Research Council. *Understanding risk: Informing decisions in a Democratic society*. Washington, DC: National Academy Press, 1996.
- w18 Silbergeld EK. Developing formal risk assessment methods for neurotoxicants: An evaluation of the state of the art. In: Johnson BL, ed. *Advances in Neurobehavioral Toxicology: Applications in Occupational and Environmental Health*. Chelsea, MI: Lewis Publishing Co., 1990:133-148.
- w19 Simonsen L, Lund SP, Hass U. An approach to risk assessment. *NeuroToxicol* 1996;**17**:815-824.
- w20 Sobotka TJ, Ekelman KB, Slikker W Jr., *et al.* Food and Drug Administration proposed guidelines for neurotoxicological testing of food chemicals. *NeuroToxicol* 1996;**17**:825-836.
- w21 Weiss B. Manganese in the context of an integrated risk and decision process. *NeuroToxicol* 1999;**20**:519-526.
- w22 Anger WK, Storzbach D, Binder LM, *et al.* Neurobehavioral Deficits in Persian Gulf Veterans: Evidence from a Population-Based Study. *J Int Neuropsych Soc* 1999;**5**:203-212.
- w23 Liang Y-x, Chen Z-q, Sun R-k, *et al.* Application of the WHO Neurobehavioral Core Test Battery and other neurobehavioral screening methods. In: Johnson BL, ed. *Advances in neurobehavioral toxicology: Applications in Occupational and Environmental Health*. Chelsea, MI: Lewis Publishing Co., 1990:225-243.
- w24 Bowler RM, Mergler D, Rauch SS, *et al.* Affective and personality disturbances among female former microelectronics workers. *J Clin Psychol* 1991;41-52.
- w25 Bowler RM, Thaler CD, Becker CE. California neuropsychological screening battery (CNS/B I & II). *J Clin Psychol* 1986;**42**:946-955.
- w26 Altmann L, Neuhann H-F, Krämer U, *et al.* Neurobehavioral and neurophysiological outcome of chronic low-level tetrachloroethene exposure measured in neighborhoods of dry cleaning shops. *Environ Res* 1995;**69**:83-89.

- w27 Bolle L, Herrera H, Lorétan E, *et al.* Neurobehavioral test performance among apprentice painters: Baseline data. *Am J Ind Med* 1996;**29**:539-546.
- w28 Calvert GM, Mueller CA, Fajen JM, *et al.* Health effects associated with sulfuric fluoride and methyl bromide exposure among structural fumigation workers. *Am J Public Health* 1998;**88**:1774-1780.
- w29 Echeverria D, Heyer NJ, Martin MD, *et al.* Behavioral effects of low-level exposure to Hg<sup>o</sup> among dentists. *Neurotoxicol Teratol* 1995;**17**:161-168.
- w30 Grosch JW, Neale AV, Demers RY. Neurobehavioral and health-related deficits in solvent-exposed painters. *Am J Ind Med* 1996;**30**:623-632.
- w31 Letz R, Mahoney FC, Hershman DL, *et al.* Neurobehavioral effects of acute styrene exposure in fiberglass boatbuilders. *Neurotoxicol Teratol* 1990;**12**:665-668.
- w32 Liang Y-x, Sun R-k, Sun Y, *et al.* Psychological effects of low exposure to mercury vapor: Application of a computer-administered neurobehavioral evaluation system. *Environ Res* 1993;**60**:320-327.
- w33 Mahoney FC, Moore PA, Baker EL, *et al.* Experimental nitrous oxide exposure as a model system for evaluating neurobehavioral tests. *Toxicol* 1988;**49**:449-457.
- w34 Wechsler D. *Manual for the Wechsler Adult Intelligence Scale*. New York: Psychological Corporation, 1955.
- w35 Bowler R, Sudia S, Mergler D, *et al.* Comparison of Digit Symbol and Symbol Digit Modalities Tests for Assessing Neurotoxic Exposure. *Clin Neuropsychologist* 1992; **6**:103-4.
- w36 Gerr F, Letz R. Epidemiological case definitions of peripheral neuropathy: Experience from two neurotoxicity studies. *Neurotoxicol* 2000;**21**:761-768.
- w37 Letz R, Gerr F. Reliability of some tremor measurement outcome variables in field testing situations. *NeuroToxicol* 2000;**21**:737-742.
- w38 Gobba F, Cavalleri A. Evolution of color vision loss induced by occupational exposure to chemicals. *Neurotoxicol* 2000;**21**:777-782.
- w39 Hudnell HK, Otto DA, House DE. The influence of vision on computerized neurobehavioral test scores: A proposal for improving test protocols. *Neurotoxicol Teratol* 1996;**18**:391-400.

- w40 Fray PJ, Robbins TW. CANTAB Battery: Proposed utility in neurotoxicology. *Neurotoxicol Teratol* 1996;**18**:499-504.
- w41 Rohlman DS, Gimenes L, Eckerman DA, *et al.* Development of the Behavioral Assessment and Research System (BARS) to detect and characterize neurotoxicity in humans. *NeuroToxicology*, in press.
- w42 Anger WK, Hudnell K, Keifer M, *et al.* Neurobehavioral performance in lifelong orchard workers by age. *NeuroToxicol* 2000;**21**:874-875 (abstract).
- w43 Bearer CF. The special and unique vulnerability of children to environmental hazards. *NeuroToxicol* 2000;**21**:925-934.
- w44 Needleman HL, Gunnoe C, Leviton A, *et al.* Deficits in psychologic and classroom performance of children with elevated dentine lead levels. *New Engl J Med* 1979;**300**:689-695.
- w45 Winneke G, Brockhaus A, Ewers U, *et al.* Results from the multicenter study on lead neurotoxicology in children: Implications for risk assessment. *Neurotoxicol Teratol* 1990;**12**:553-559.
- w46 Jacobson JL, Jacobson SW. Intellectual impairment in children exposed to polychlorinated biphenyls in utero. *New Engl J Med* 1996;**335**:783-789.
- w47 Gladen BC, Rogan WJ. Effects of perinatal polychlorinated biphenyls and dichlorodipheyl dichloroethene on later development. *J Pediatrics* 1991;**119**:58-63.
- w48 Rohlman DS, Bailey S, Brown M, *et al.* Establishing stable test performance in tests from the Behavioral Assessment and Research System (BARS). *NeuroToxicol* 2000;**21**:715-724.
- w49 Maizlish N, Schenker M, Weisskopf C, *et al.* A behavioral evaluation of pest control workers with short-term, low-level exposure to the organophosphate diazinon. *Am J Ind Med* 1987;**12**:153-172.
- w50 Yang H-G, Liang Y-X, Tang H-W, *et al.* Neuropsychological effects of lead exposure. *Chin J Prev Med* 1994;**28**:9-12.
- w51 Yokoyama K, Araki S, Osuga J, *et al.* [Development of Japanese edition of Neurobehavioral Evaluation System (NES) and WHO Neurobehavioral Core Test Battery (NCTB) with assessment of reliability] [Article in Japanese]. *Sangyo Igaku* 1990;**32**:354-355.
- w52 Bazylewicz-Walczak B, Walenczak J, Wesolowski W, *et al.* [Neurobehavioral effects of chronic occupational exposure to mixtures of solvents used in furniture

varnishing. Part I--Psychological examination] [Article in Polish]. *Med Pr* 1992;**43**:363-370.

- w53 Cassitto MG, Camerino D, Hänninen H, *et al.* International collaboration to evaluate the WHO Neurobehavioral Core Test Battery. In: Johnson BL, Anger WK, Durao A, Xintaras C, eds. *Advances in Neurobehavioral Toxicology: Applications in Environmental and Occupational Health*. Chelsea, MI:Lewis Publishers, 1990:203-223.
- w54 Cassitto MG, Gilioli R, Camerino D. Experiences with the Milan Automated Neurobehavioral System (MANS) in occupational neurotoxic exposure. *Neurotoxicol Teratol* 1989;**11**:571-574.
- w55 Chen ZQ, Yu JH, Cao SH. Reference values of indicators for WHO neurobehavioral core test battery. *Chin Med J* 1990;**103**(1):61-65.
- w56 Chia SE, Chia HP, Ong CN, *et al.* Cumulative blood lead levels and neurobehavioral test performance. *Neurotoxicol* 1997;**18**:793-803.
- w57 Cordeiro R, Lima Filho EC, Salgado PE, *et al.* [Neurological disorders in workers with low levels of lead in the blood. II--Neuropsychological disorders] [Article in Portugese]. *Rev Saude Publica* 1996;**30**:358-363.
- w58 Dudek B. Adaptation of the WHO NCTB for use in Poland for detection of effects of exposure to neurotoxic agents. *Environ Res* 1993;**61**:349-356.
- w59 Escalona E, Yanes L, Feo O, *et al.* Neurobehavioral evaluation of Venezuelan workers exposed to organic solvent mixtures. *Am J Ind Med* 1995;**27**:15-27.
- w60 Fallas C, Fallas J, Maslard P, *et al.* Subclinical impairment of colour vision among workers exposed to styrene. *Br J Ind Med* 1994;**9**:679-682
- w61 Lee SH, Lee SH. A study on the neurobehavioral effects of occupational exposure to organic solvents in Korean workers. *Environ Res* 1993;**60**:227-232.
- w62 Maizlish NA, Parra G, Feo O. Neurobehavioural evaluation of Venezuelan workers exposed to inorganic lead. *Occup Environ Med* 1995;**52**:408-414.
- w63 Mergler D, Huel G, Belanger S, *et al.* Surveillance of early neurotoxic dysfunction. *Neurotoxicol* 1996;**17**:803-812.
- w64 Ohnishi A, Mori K, Fujishiro K, *et al.* [Application of neurobehavioral tests in a manufacturing automotive parts factory] [Article in Japanese]. *Sangyo Ika Daigaku Zasshi* 1995;**17**:165-172.

- w65 Reif JS, Tsongas TA, Anger WK, *et al.* Two-stage evaluation of exposure to mercury and biomarkers of neurotoxicity at a hazardous wastesite. *Toxicol Environ Health* 1993;**40**:413-422.
- w66 Tang HW, Liang YX, Hu XH, *et al.* Alterations of monoamine metabolites and neurobehavioral function in lead-exposed workers. *Biomed Environ Sci* 1995; **8**:23-29.
- w67 Waszkowska M, Bazylewicz-Walczak B. [Psychological evaluation of the effects of chronic occupational exposure of paint shop workers to the mixture of organic solvents] [Article in Polish]. *Med Pr* 1992;**43**:35-39.
- w68 Xu H, Zhang X, Xue B [Studies on comprehensive evaluation of toxic hazard in low-concentration benzene pollution] [Article in Chinese]. *Chung Hua Yu Fang I Hsueh Tsa Chih* 1995;**29**:264-266.
- w69 Acuna MC, Diaz V, Tapia R, *et al.* [Assessment of neurotoxic effects of methyl bromide in exposed workers] [Article in Spanish]. *Rev Med Chil* 1997;**125**: 36-42.
- w70 Rohlman DS, Gimenes LS, Ebbert CA, *et al.* Smiling faces and other rewards: Using the Behavioral Assessment and Research System (BARS) with unique populations. *NeuroToxicol* 2000;**21**:973-978.
- w71 Camicioli R, Grossmann SJ, Spencer PS, *et al.* Discriminating mild Parkinsonism: Methods for epidemiological research. *Movement Disorders* 2001;**16**:33-40.
- w72 Anger WK, Storzbach D, Rohlman DS, *et al.* Exposure to Jet Fuel in Air Force Personnel. Behavioral Toxicology Society, Research Triangle Park, NC. May 5-6, 2001.
- w73 Binder LM, Storzbach D, Anger WK, *et al.* Subjective cognitive complaints, affective distress, and objective cognitive performance in Persian Gulf War veterans. *Arch Clin Neuropsych* 1999;**14**:531-536.
- w74 Storzbach D, Campbell K, Binder LM, *et al.* Psychological differences between veterans with and without Persian Gulf war unexplained symptoms. *Psychosom Med* 2000;**62**:726-735.
- w75 Storzbach D, Rohlman DS, Anger WK, *et al.* Neurobehavioral deficits in Persian Gulf veterans: Additional evidence from a population-based study. *Environ Res* 2001;**85**:1-13.
- w76 Campbell KA, Rohlman DS, Storzbach D, *et al.* Test-retest reliability of psychological and neurobehavioral tests self-administered by computer. *Assessment* 1999;**6**:21-32.

- w77 Binder LM, Storzbach D, Campbell KA, *et al.* Neurobehavioral deficits associated with chronic fatigue syndrome in veterans with Gulf War unexplained illness. *J Int Neuropsychol Soc* 2001;**7**:835-839.
- w78 Otto D, Molhave L, Rose G, *et al.* Neurobehavioral and sensory irritant effects of controlled exposure to a complex mixture of volatile organic compounds. *Neurotoxicol Teratol* 1990;**12**:1-4.
- w79 Steenland K, Jenkins B, Ames RG, *et al.* Chronic neurological sequelae of organophosphate pesticide poisoning. *Am J Public Health* 1994;**84**:731-736.
- w80 Tsai SY, Chen JD, Chao WY, *et al.* Neurobehavioral Effects of Occupational Exposure to Low-Level Organic Solvents among Taiwanese Workers in Paint Factories. *Environ Res* 1997;**73**:146-155.
- w81 Walkowiak J, Altmann L, Krämer U, *et al.* Cognitive and sensorimotor functions in 6-year-old children in relation to lead and mercury levels: Adjustment for intelligence and contrast sensitivity in computerized testing. *Neurotoxicol Teratol* 1998;**20**:511-521.
- w82 Iregren A. Using psychological tests for the early detection of neurotoxic effects of low level manganese exposure. *Neurotoxicology* 1994;**15**:671-677.
- w83 Lucchini R, Selis L, Folli D, *et al.* Neurobehavioral effects of manganese in workers from a ferroalloy plant after temporary cessation of exposure. *Scand J Work Environ Health* 1995;**21**:143-149.
- w84 Sjogren B, Iregren A, Frech W, *et al.* Effects on the nervous system among welders exposed to aluminium and manganese. *Occup Environ Med.* 1996;**53**:32-40.
- w85 Van Thriel C, Kleinsorge T, Zupanic M, *et al.* Switching attention—Additional aspects for the analysis. *NeuroToxicol* 2000, **21**:795-804.
- w86 Wennberg A, Iregren A, Struwe G, *et al.* Manganese exposure in steel smelters a health hazard to the nervous system. *Scand J Work Environ Health* 1991;**17**:255-62.
- w87 Chia SE, Teo KJ. Postural stability and neurobehavioural effects of heat exhaustion among adult men. *Neurotoxicol Teratol.* 2001;**23**:659-664.
- w88 Feyer A-M, Williamson, A, Friswell, R. Balancing work and rest to combat driver fatigue: An investigation of two-up driving in Australia. *Accident Anal Prevent* 1997; **29**:541-553
- w89 Williamson AM, Clarke B, Edmonds C. Neurobehavioral effects of professional abalone diving. *Br J Ind Med.* 1987;**44**:459-466.

- w90 Williamson AM, Feyer A-M, Friswell R. The impact of work practices on fatigue in long distance truck drivers. *Accid Anal Prevent* 1996;**28**:709-719.
- w91 Williamson AM, Teo RKC, Sanderson J. Occupational mercury exposure and its consequences for behavior. *Int Arch Occup Environ Health* 1982;**50**:273-286.
- w92 Stollery BT. Long-term cognitive sequelae of solvent intoxication. *Neurotoxicol Teratol* 1996;**18**:471-476.
- w93 Stollery BT. Reaction time changes in workers exposed to lead. *Neurotoxicol Teratol* 1996;**18**:477-483.
- w94 Netterstrøm B, Guldager B, Heebøll. Acute mercury intoxication examined with coordination ability and tremor. *Neurotoxicol Teratol* 1996;**18**:505-509.
- w95 Despres C, Lamoureaux D, Beuter A. Standardization of a neuromotor test battery: The CATSYS system. *NeuroToxicol* 2000;**21**:725-736.
- w96 Binder LM. Assessment of malingering after mild head trauma with the Portland Digit Recognition Test. *J Clin Exp Neuropsychol* 1993;**15**:170-182.
- w97 Binder LM, Kelly MP. Portland Digit Recognition Test performance by brain dysfunction patients without financial incentives. *Assessment* 1996;**3**:403-409.
- w98 Karlson B, Österberg K, Orbæk P. Euroquest: The validity of a new symptom questionnaire. *NeuroToxicol* 2000;**21**:783-790.
- w99 Beck AT, Steer RA, Garbin M. Psychometric properties of the Beck Depression Inventory: Twenty-five years of evaluation. *Clin Psychol Rev* 1988;**8**:77-100.
- w100 Beck AT, Epstein N, Brown G, Steer RA. An inventory for measuring clinical anxiety: Psychometric properties. *J Consulting Clin Psychol* 1988;**56**:893-897.
- w101 Kovera CA, Anger WK, Campbell, KA, *et al.* Computer-Administration of Questionnaires: A Health Screening System (HSS) Developed for Veterans. *Neurotoxicol Teratol*, 1996;**18**:511-518.
- w102 Bowler RM, Hartney C, Ngo LH. Amnesic disturbance and posttraumatic stress disorder in the aftermath of a chemical release. *Arch Clin Neuropsychol* 1998;**13**:455-471.
- w103 Bowler R, Huel G, Mergler D, *et al.*, Symptom base rates after chemical exposure for white, Hispanic and African-Americans. *NeuroToxicol* 1996;**17**:793-802.



- w104 Bowler R, Mergler D, Huel G, *et al.* Adverse health effects in African-American residents living adjacent to chemical industries. *J Black Psychol* 1999;**22**:470-497.
- w105 Bowler RM, Ngo L, Hartney C. Epidemiological health study of a town exposed to chemicals. *Environ Res* 1997;**72**:93-108.
- w106 Anger WK, Rohlman DS, Storzbach D. Neurobehavioral Testing in Humans. In: Mains M, Costa L, Snipes IG, Sasse S, Reed DJ, eds. *Current Protocols in Toxicology*. New York: John Wiley & Sons, 1999:11.7.1-11.7.17.
- w107 Heyer NJ, Bittner AC, Jr., Echeverria D. Analyzing multivariate neurobehavioral outcomes in occupational studies: A comparison of approaches. *Neurotoxicol Teratol* 1996;**18**:401-406.
- w108 Eckerman DA, Glowa JR, Anger WK. Human variability in response to chemical exposures. In: Neumann DA, Kimmel CA, eds. *Measures, Modeling and Risk Assessment*. Washington, DC: CRC Press (ILSI Press), 1998:59-85.
- w109 Letz R, Pieper WA, Morris RD. NES test performance in a large US Army veteran sample: Relationships with both demographic factors and traditional neuropsychological measures. *Neurotoxicol Teratol* 1996;**18**:381-390.
- w110 Keisswetter E, Seeber A, Blaszkewicz M, *et al.* Neurobehavioral effects of solvents and circadian rhythms. *NeuroToxicol* 1996;**17**:777-784.
- w111 Mikkelsen S. Solvent Encephalopathy: Disability pension studies and other case studies. In: Chang LW, Dyer RS, eds. *Handbook of Neurotoxicology*. NY: Marcel Dekker, Inc, 1995:323-338.
- w112 National Institute for Occupational Safety and Health (NIOSH). *National Occupational Research Agenda*. Atlanta, GA: NIOSH Publication Office; Pub. 96-115, 1996.
- w113 Proctor SP, Harley RF, Wolfe J, *et al.* Health-related quality of life in Gulf War veterans. *Military Med* 2001;**166**:510-519.
- w114 White RF, Proctor SP, Heeren T, *et al.* Neuropsychological function in Gulf War veterans: Relationships to self-reported toxicant exposures. *Am J Ind Med* 2001;**40**:42-54.
- w115 Bellinger DC. Interpreting the literature on lead and child development: The neglected role of the experimental system. *Neurotoxicol Teratol* 1995;**17**:201-212.
- w116 Swinker M, Koltai D, Wilkins J, *et al.* Estuary-associated syndrome in North Carolina: An occupational prevalence study. *Environ Health Perspect* 2001;**109**:21-26.

- w117 Gilioli R. EURONEST: A concerted action of the European Community for the study of organic solvent neurotoxicity. *Environ Res* 1993;**62**:89-98.
- w118 Triebig G, Lehl S, Barocka A. International multicenter cross-sectional studies on chronic CNS effects of solvents in paint industries. In: Johnson BL, ed. *Advances in Neurobehavioral Toxicology: Applications in Occupational and Environmental Health*. Chelsea, MI: Lewis Publishing Co., 1990:297-304.
- w119 Evens CC, Martin MD, Woods JS, *et al.* Examination of dietary methylmercury exposure in the Casa Pia Study of the health effects of dental amalgams in children. *J Toxicol Environ Health* 2001;**64**:521-530.
